# Supplementary material for: Synthesis and Characterization of Versatile Polymer Particles for the Adsorption of Bromophenol Blue and Phenol
Source: Research Square preprint supplement (doi:10.21203/rs.3.rs-3481924/v1), 2023-10-28
Supplement: Supplementary file 1 [file 3ca43218afce4dbf58f3185c.pdf]

## SUPPLEMENTARY DOCUMENT

### Synthesis and Characterization of Versatile Polymer Particles for the Adsorption of Bromophenol Blue and Phenol

Kutalmis Gokkus<sup>1\*</sup>, Cigdem Oter<sup>2</sup>, Merilyn Amlani<sup>3</sup>, Mahmut Gur<sup>4</sup>, Vural Butun<sup>5</sup>.

<sup>1</sup>Kastamonu University, Faculty of Engineering and Architecture Department of Environmental Engineering, Kuzeyskent Campus, 37500, Kastamonu, Turkey, ORCID:0000-0002-4016-4283, kgokkus@kastamonu.edu.tr

<sup>2</sup>Van Yuzuncu Yil University, Faculty of Science, Department of Chemistry, Van, Turkey, ORCID:0000-0002-8262-4882

<sup>3</sup>Mindanao State university, Tawi-Tawi College of Technology and Oceanography, 7500, Marawi, Philippines

<sup>4</sup>Kastamonu University, Faculty of Forest Department of Forest Industrial Engineering, Kuzeyskent Campus, 37500, Kastamonu, Turkey, ORCID: 0000-0001-9942-6324

<sup>5</sup>Osmangazi University, Faculty of Science, Department of Chemistry, Meselik Campus, Eskisehir, Turkey, ORCID:0000-0003-4542-5080

#### Characterisation of GD polymer particles

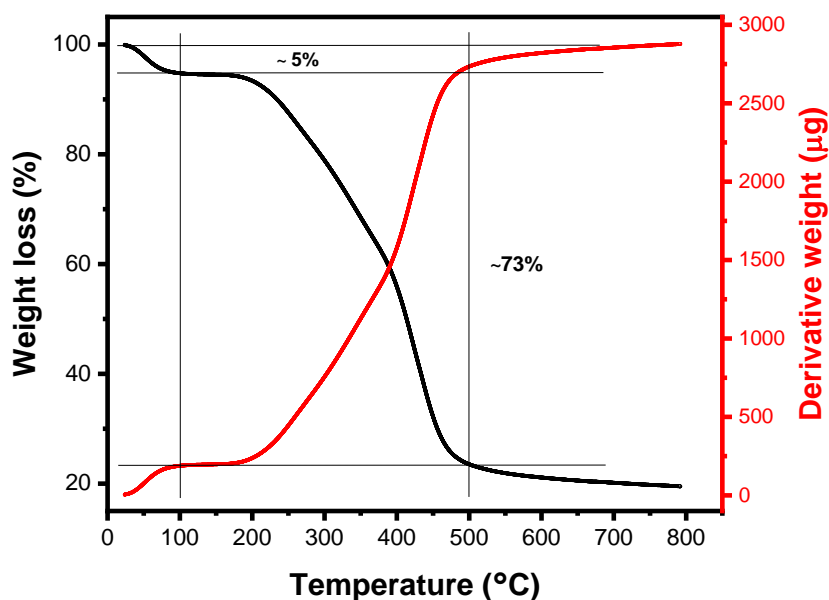

Figure S1. Thermogravimetric analysis of GD particles

#### Adsorption kinetics

Pseudo first order (PFO) kinetic model (Lagergren, 1898), pseudo second order (PSO) kinetic model (Ho ve McKay, 1999), Weber-Morris intraparticle diffusion (Weber ve Morris, 1980) and Elovich (Chien ve Clayton, 1980) kinetic models were used to understand the mechanism of adsorption between bromophenol blue, phenol and GD particles. The models were calculated with the equations I, II, III and IV given below, respectively.

$$\log(q_e - q_t) = \log q_e - \frac{k_1 t}{2,303} \quad (\text{I})$$

$$\frac{t}{q_t} = \frac{1}{k_2 q_e^2} + \frac{t}{q_e} \quad (\text{II})$$

$$q_t = k_1 t^{1/2} + C \quad \text{(III)}$$

$$q_t = \frac{1}{\alpha} \ln(\alpha * \beta) + \frac{1}{\alpha} \ln t \quad \text{(IV)}$$

where  $q_e$  and  $q_t$  are the amount of dye adsorbed by the adsorbent at equilibrium time and adsorption time (mg/g), respectively.  $t$  is the adsorption time (min).  $k_1$  (min<sup>-1</sup>),  $k_2$  (g.mg<sup>-1</sup>.min<sup>-1</sup>) and  $k_i$  (mg.g<sup>-1</sup>.min<sup>-1/2</sup>) are constants of pseudo-first, pseudo-second-order and Weber-Morris intraparticle diffusion models, respectively.  $C$  is a constant that gives information about the thickness of the layer formed between the adsorbate and the adsorbent.  $\alpha$  is the initial adsorption rate (mg/g.min) and  $\beta$  is a constant (g/mg) associated with the size of the surface area and the activation energy of chemical adsorption.

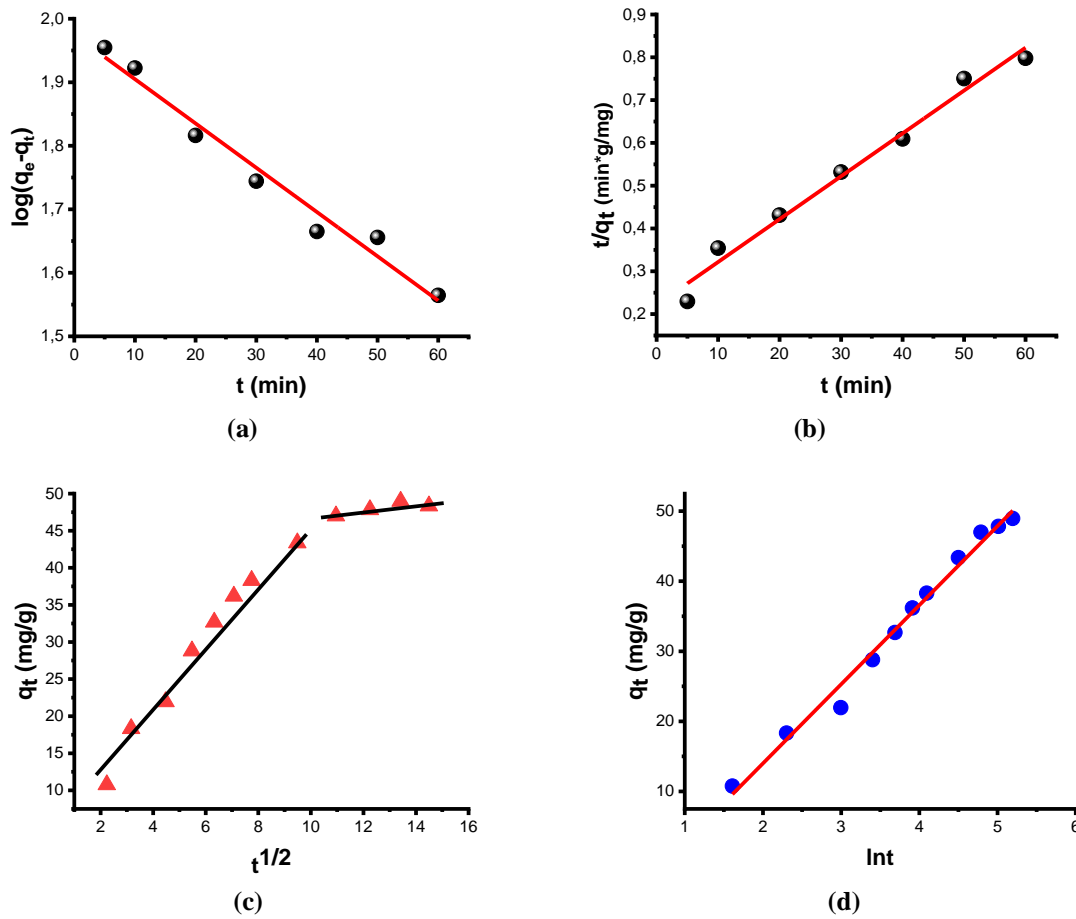

**Figure S2.** (a) Pseudo first order, (b) pseudo second order, (c) interparticle diffusion model and (d) Elovich kinetic models for the adsorption of BPB dye on GD polymer particles **linear fit model** ( $t$ : 0-180 min; initial conc.: 100 mg/L;  $T$ : 25°C; adsorbent: 50 mg;  $V$ : 25 mL)

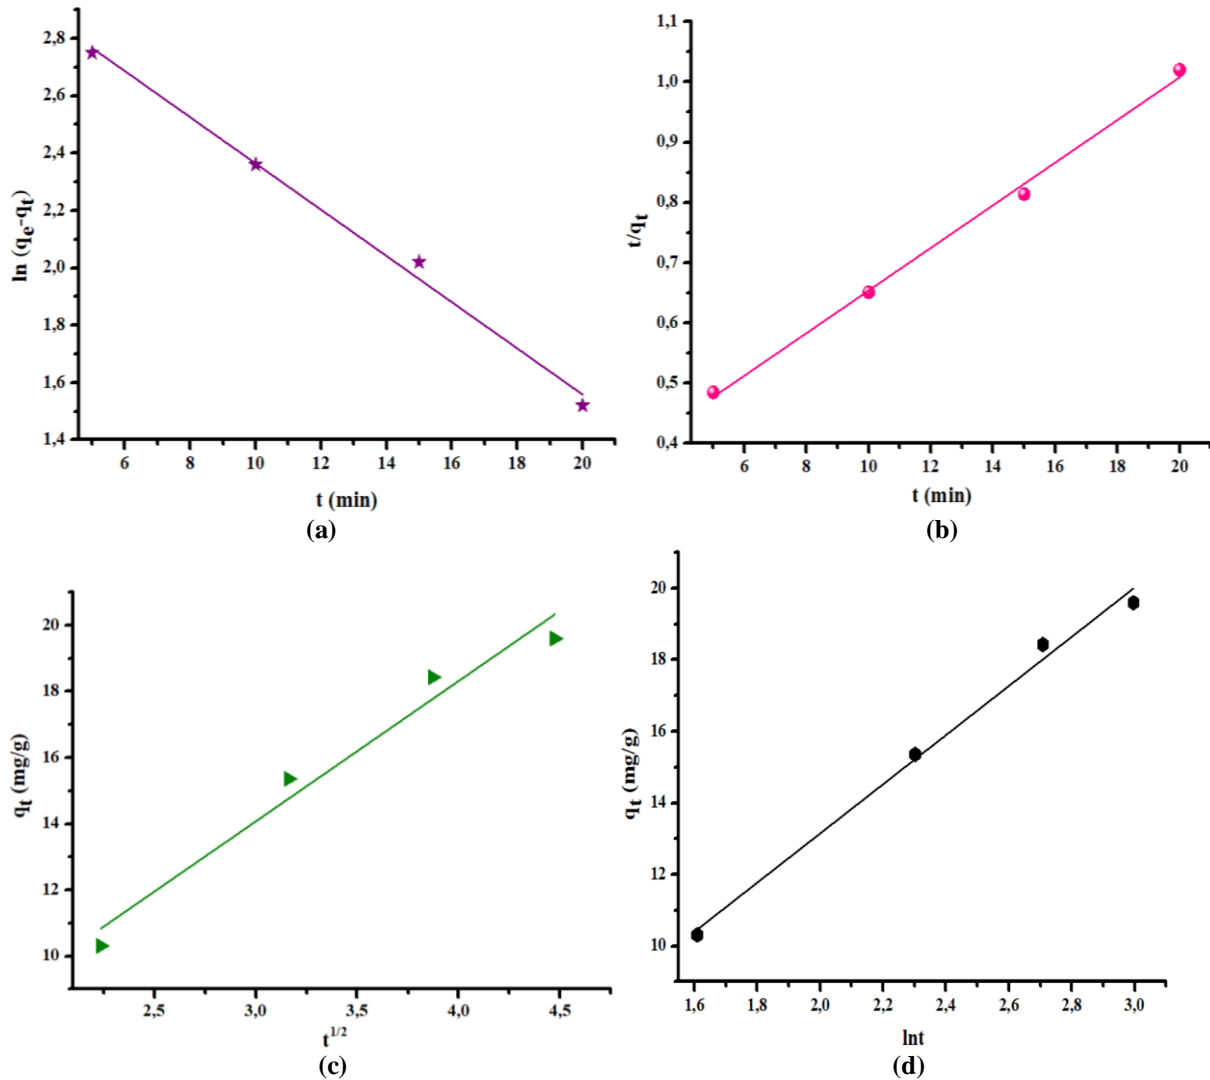

**Figure S3.** (a) Pseudo first order, (b) pseudo second order, (c) interparticle diffusion model and (d) Elovich kinetic models for the adsorption of phenol on GD polymer particles **linear fit model** (pH:5.5; initial conc. 50 mg/L; adsorbent 15 mg, V:10 mL, T:25°C, 400 rpm)

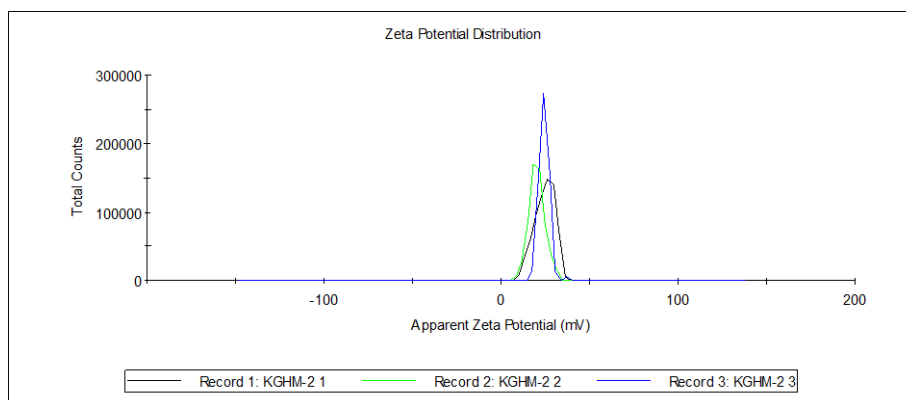

**Figure S4.** Zeta potential of GD polymer particles

## **Adsorption isotherms**

### **- Langmuir isotherm**

In the Langmuir isotherm; i) there is no interaction between pollutants, ii) each region of the adsorbent has the same (homogeneous) adsorption efficiency, and iii) it is assumed that the pollutants are adsorbed on the adsorbent

surface as a single layer (Jiang et al., 2017; You et al., 2018; Kloster et al., 2019; Dai et al., 2020) and the following equation was calculated with V.

$$\frac{C_e}{q_e} = \frac{1}{K_L q_{max}} + \frac{C_e}{q_{max}} \quad (V)$$

where  $C_e$  is the concentration of the dye solution at equilibrium (mg/L),  $q_e$  is the amount of dye adsorbed per unit weight of the adsorbent at equilibrium (mg/g),  $q_m$  is the maximum adsorption capacity (mg/g) of the GD particles adsorbate corresponding to the monolayer, and  $K_L$  is the Langmuir adsorption constant (L/mg) related to the affinity between the adsorbate and binding sites of the adsorbate. Also, the feasibility of adsorption can be demonstrated by the dimensionless separation factor  $R_L$  given by the following equation:

$$R_L = \frac{1}{(1 + K_L C_0)} \quad (VI)$$

$C_0$  (mg/L) is the initial dye concentration. The value of the separation factor indicates the suitability of the adsorption process as follows: If  $R_L > 1$ , adsorption is unfavorable; linear if  $R_L = 1$ ; If  $0 < R_L < 1$ , the adsorption is appropriate and if  $R_L = 0$ , the adsorption is irreversible.

- Freundlich isotherm

It is accepted that the adsorbent surface is heterogeneous in the Freundlich isotherm and therefore the adsorption takes place in a multilayered manner (Guo et al., 2019; Kloster et al., 2019; Kumar et al., 2019). The following equation was calculated with VII.

$$\log q_e = \log K_F + \frac{1}{n} \log C_e \quad (VII)$$

Here  $K_F$  is the Freundlich isotherm constant for the amount of dye adsorbed for an equilibrium concentration.  $n$  is a number revealing the property of the energy distribution function and the value of  $1/n$  is estimated from the slope of the same graph. The graph of  $\log q_e$  as a function of  $\log C_e$  allows the determination of the constant  $K_F$  and  $n$ .

- Temkin isotherm

Unlike the Langmuir and Freundlich equations, the Temkin isotherm takes into account the interaction between adsorbate and adsorbent. According to the Temkin isotherm, the decrease in the heat of adsorption of all molecules occurs in a linear order. This indicates that the binding energy is homogeneous (Adeogun and Balakrishnan, 2015; Ahmed and Abou-Gamra, 2016; Chauhan et al., 2021). The linear equation of the Temkin constant is shown below in equations VIII and IX:

$$q_e = \beta_t \ln K_T + \beta_t \ln C_e \quad (VIII)$$

$$\beta_t = \frac{RT}{b} \quad (IX)$$

$K_T$  is the equilibrium constant corresponding to the maximum binding energy (L/g).  $\beta_t$  is the constant with respect to the heat of adsorption.  $b$  is the Temkin constant for heat absorption (J/mg).  $R$  is the gas constant (J/mol K) and  $T$  is the temperature (K).  $K_T$  and  $\beta_t$  are calculated from the slope and intersection of the plot of  $\ln C_e$  versus  $q_e$ .

- Dubinin- Radushkevich (D-R) isotherm

This isotherm is used to estimate the heterogeneity of surface energies and the nature of the adsorption process physically or chemically by calculating the adsorption energy (Altaher et al., 2014; Adeogun and Balakrishnan

2015; Ahmed and Abou-Gamra 2016; Mazaheri et al. 2016). The isotherm was calculated with the following equation X.

$$\ln q_e = \ln q_m - B \varepsilon^2 \quad (X)$$

Here,  $q_e$  is the amount of adsorbate (mg/g) adsorbed on the adsorbent surface at equilibrium.  $q_m$  is the D-R monolayer capacity (mg/g).  $B$  is a constant related to the average free adsorption energy per mole of adsorbate as it is transferred from infinite distance to the surface of the solid.  $\varepsilon$  is the Polonyi potential associated with the equilibrium concentration.

$$\varepsilon = RT \ln(1 + 1/C_e) \quad (XI)$$

Here  $R$  is the ideal gas constant (kJ/mol K) and  $T$  is the temperature (K). The coefficients  $q_m$  and  $B$  can be calculated from the graph of  $\varepsilon^2$  versus  $\ln q_e$ . The constant  $B$  ( $\text{mg}^2/\text{J}^2$ ) allows us to find the adsorption energy ( $E$ ).

$$E = \frac{1}{\sqrt{2B}} \quad (XII)$$

If  $E < 8$  kJ/mol, the adsorption process is physical, if  $8 < E < 16$  kJ/mol, the adsorption process is ion exchange, and if  $E > 16$  kJ/mol, the adsorption process is chemical.

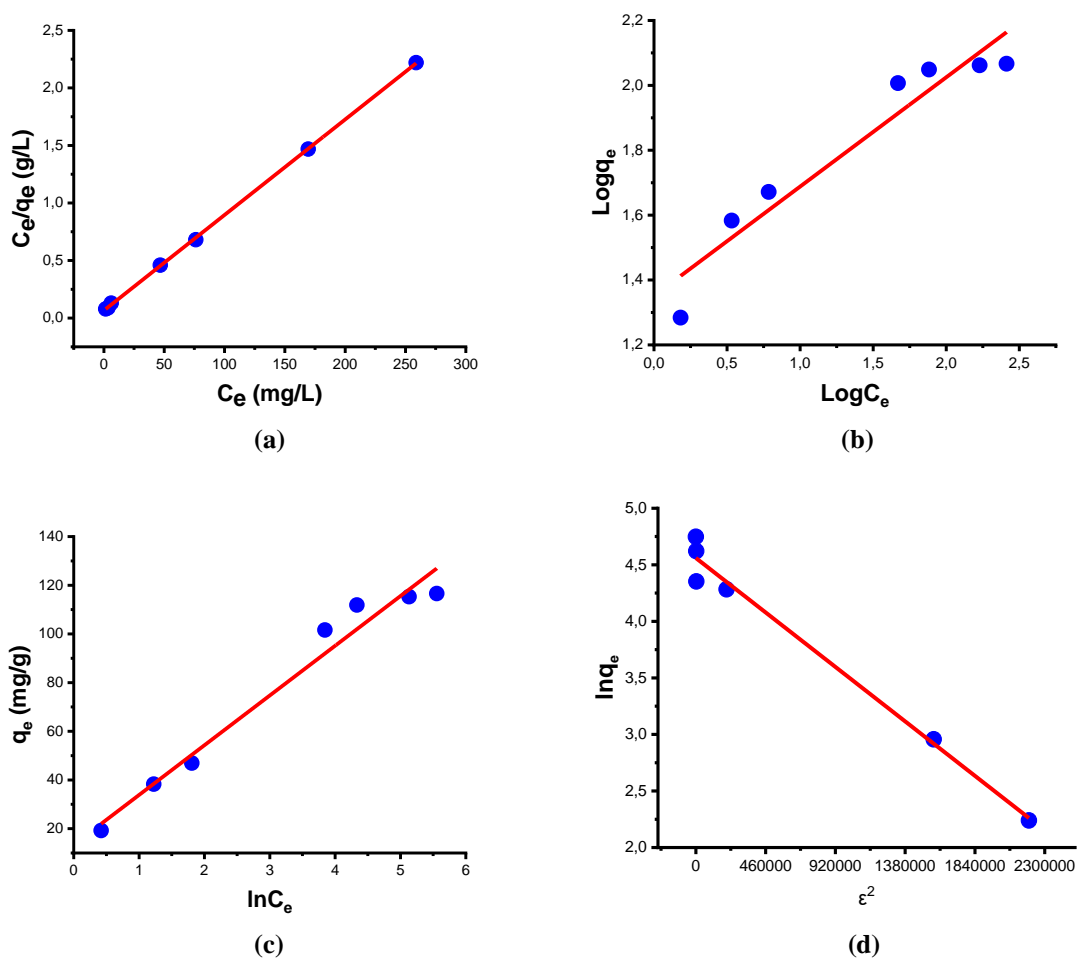

**Figure S5.** (a) Langmuir, (b) Freundlich, (c) Temkin and (d) D-R adsorption isotherm for the adsorption of BPB dye on GD polymer particles **linear fit model** (t: 180 min; pH: 4.0; T: 25°C; adsorbent: 50 mg; V: 25 mL)

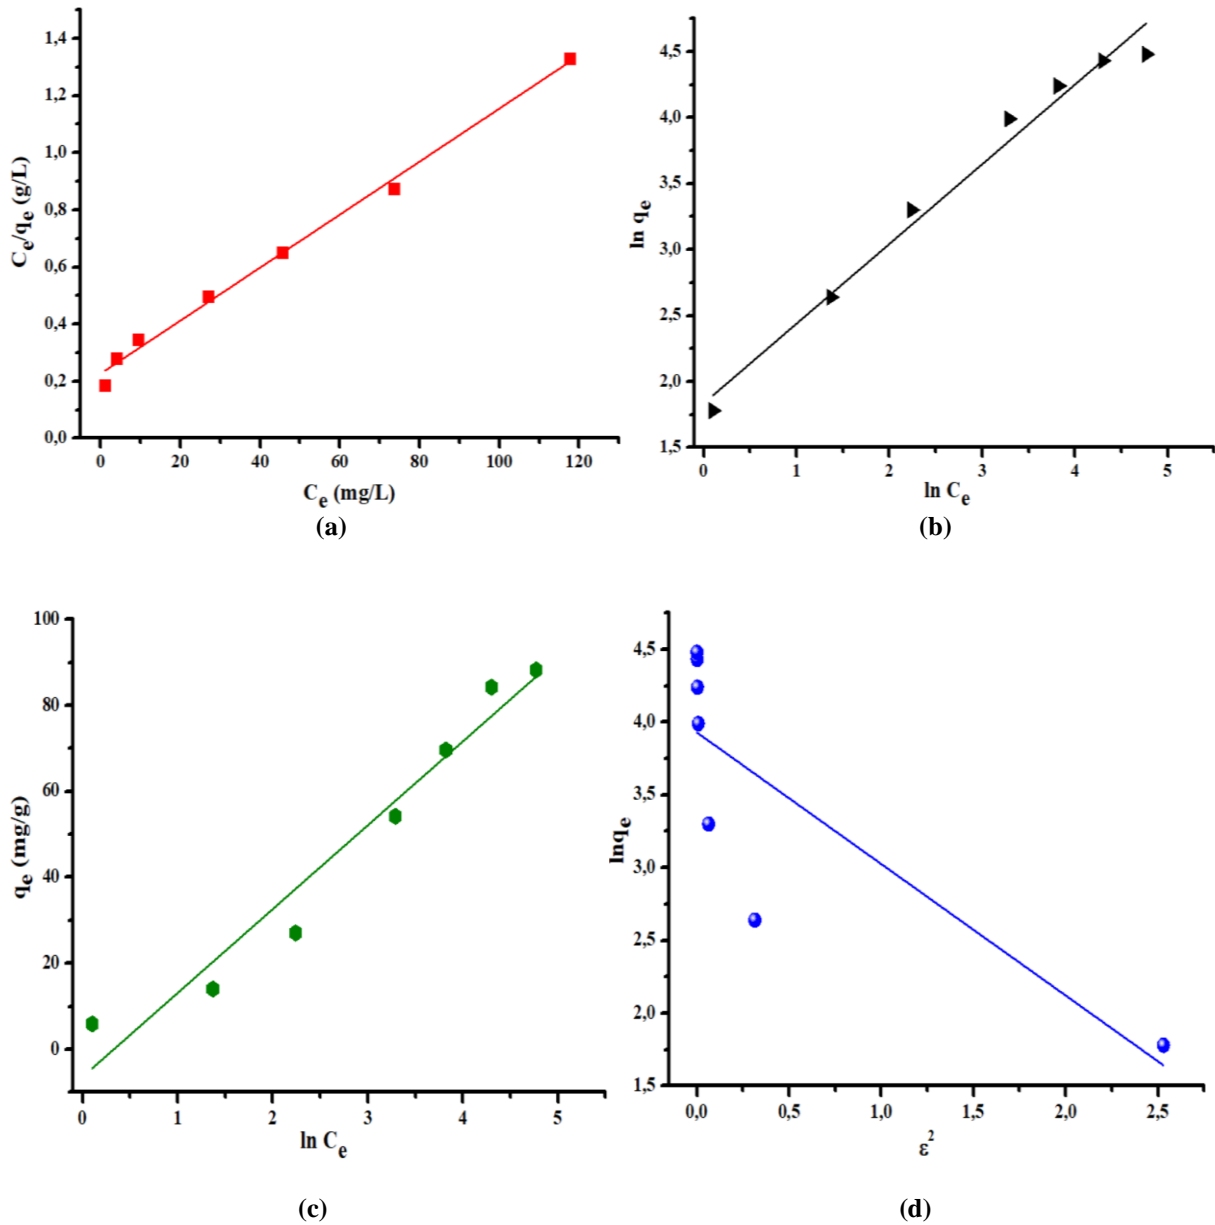

**Figure S6.** (a) Langmuir, (b) Freundlich, (c) Temkin and (d) D-R adsorption isotherm for the adsorption of phenol on GD polymer particles **linear fit model** (t: 30 min; pH: 5.0; adsorbent 15 mg, V:10 mL, 400 rpm)

### Adsorption thermodynamics

In this study, the thermodynamics of adsorption was evaluated with parameters such as Gibbs free energy ( $\Delta G^\circ$ ), enthalpy ( $\Delta H^\circ$ ) and entropy ( $\Delta S^\circ$ ) changes. Gibbs free energy,  $\Delta H^\circ$  and  $\Delta S^\circ$  were calculated with the following equations XIII, XIV and XV, respectively.

$$K_d = \frac{C_e}{q_e} \quad (XIII)$$

$$\ln K_d = -\frac{\Delta H^\circ}{RT} + \frac{\Delta S^\circ}{R} \quad (XIV)$$

$$\Delta G^\circ = \Delta H^\circ - T\Delta S^\circ \quad (XV)$$

The plot of  $\ln K_d$  versus  $1/T$  yields  $\Delta H^\circ$  and  $\Delta S^\circ$  from slope and intersection, respectively (Fig. S7). R is the universal gas constant (8.314 J/molK).  $\Delta G^\circ$  is calculated from the third equation at different temperatures.

### References

- Adeogun, A. I., & Balakrishnan, R. B. (2017). Kinetics, isothermal and thermodynamics studies of electrocoagulation removal of basic dye rhodamine B from aqueous solution using steel electrodes. *Applied Water Science*, 7, 1711-1723.
- Ahmed, M. A., & Abou-Gamra, Z. M. (2016). Mesoporous MgO nanoparticles as a potential sorbent for removal of fast orange and bromophenol blue dyes. *Nanotechnology for Environmental Engineering*, 1, 1-11.
- Altaher, H., Khalil, T. E., & Abubeah, R. (2014). The effect of dye chemical structure on adsorption on activated carbon: a comparative study. *Coloration Technology*, 130(3), 205-214.
- Chauhan, P., Bhasin, K. K., & Chaudhary, S. (2021). High selectivity and adsorption proficiency of surfactant-coated selenium nanoparticles for dye removal application. *Environmental Science and Pollution Research*, 28(43), 61344-61359.
- Chien S.H., Clayton W.R. Application of Elovich equation to the kinetics of phosphate release and sorption in soils *J. Soil Sci. Soc. Am. J.* 44 (1980), 265-268.
- Dai, H., Huang, Y., Zhang, H., Ma, L., Huang, H., Wu, J., & Zhang, Y. (2020). Direct fabrication of hierarchically processed pineapple peel hydrogels for efficient Congo red adsorption. *Carbohydrate polymers*, 230, 115599.
- Guo, D. D., Li, B., Deng, Z. P., Huo, L. H., & Gao, S. (2019). Ladder chain Cd-based polymer as a highly effective adsorbent for removal of Congo red. *Ecotoxicology and Environmental Safety*, 178, 221-229.
- Ho Y.S., McKay G. Pseudo-second order model for sorption processes, *Process Biochem.* 34 (5) (1999), 451-465.
- Jiang, X., Zhou, D., Huang, X., Zhao, W., & Zhao, C. (2017). Hexanediamine functionalized poly (glycidyl methacrylate-co-N-vinylpyrrolidone) particles for bilirubin removal. *Journal of colloid and interface science*, 504, 214-222.
- Kloster, G. A., Mosiewicki, M. A., & Marcovich, N. E. (2019). Chitosan/iron oxide nanocomposite films: Effect of the composition and preparation methods on the adsorption of congo red. *Carbohydrate polymers*, 221, 186-194.
- Kumar, R., Sharma, R. K., & Singh, A. P. (2019). Grafting of cellulose with N-isopropylacrylamide and glycidyl methacrylate for efficient removal of Ni (II), Cu (II) and Pd (II) ions from aqueous solution. *Separation and Purification Technology*, 219, 249-259.
- Lagergren S. About the theory of so-called adsorption of soluble substances, *Kungl Svens Vetensk Akad Handl.* 24 (1898), 1-39.
- Mazaheri, H., Ghaedi, M., Asfaram, A., & Hajati, S. (2016). Performance of CuS nanoparticle loaded on activated carbon in the adsorption of methylene blue and bromophenol blue dyes in binary aqueous solutions: using ultrasound power and optimization by central composite design. *Journal of Molecular Liquids*, 219, 667-676.
- Weber W.J., Morris J.C. Kinetics of adsorption on carbon from solution, *J. Sanit. Eng. Div.* 89 (1963), 31-60.
- You, L., Huang, C., Lu, F., Wang, A., Liu, X., & Zhang, Q. (2018). Facile synthesis of high performance porous magnetic chitosan-polyethylenimine polymer composite for Congo red removal. *International journal of biological macromolecules*, 107, 1620-1628.
